# Supplementary material
Source: Springer Nature journal article supplement (https://www.springermedizin.de/resource/supplementary/12913_2014_3533_MOESM1_ESM.pdf/9533072)

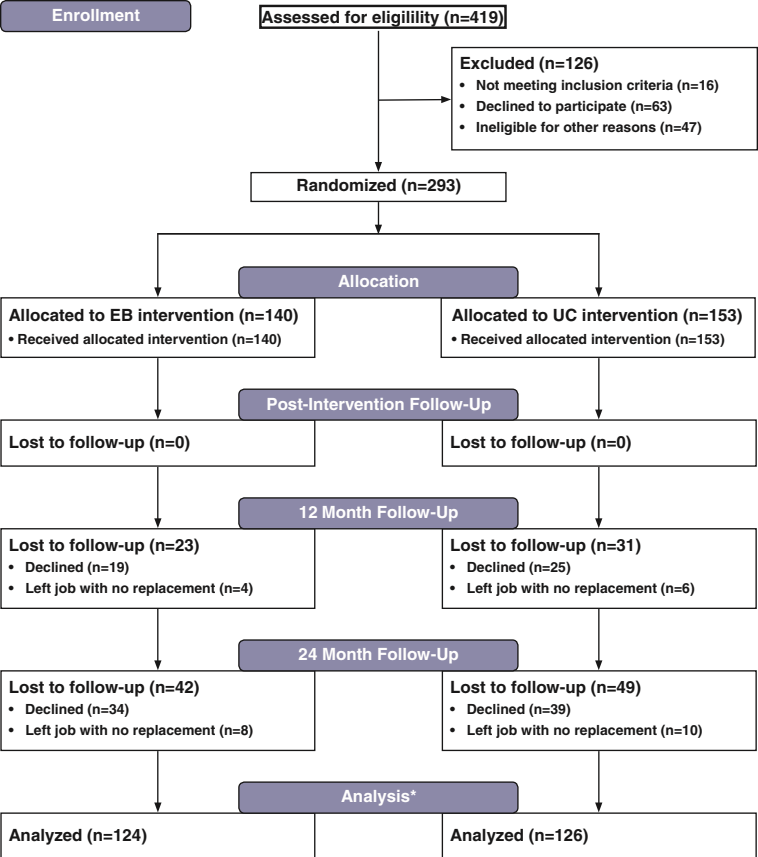

\*requires completion of 12 and/or 24 month follow-up.

Supplement: MOESM1 [file 9533072]
